# Supplementary material for: Characterization of oral and gut microbiome temporal variability in hospitalized cancer patients
Source: PubMed Central journal article supplement (PMC5331640; doi:10.1186/s13073-017-0409-1), 2017-02-28
Supplement: 13073_2017_409_MOESM1_ESM.pdf [file 13073_2017_409_MOESM1_ESM.pdf]

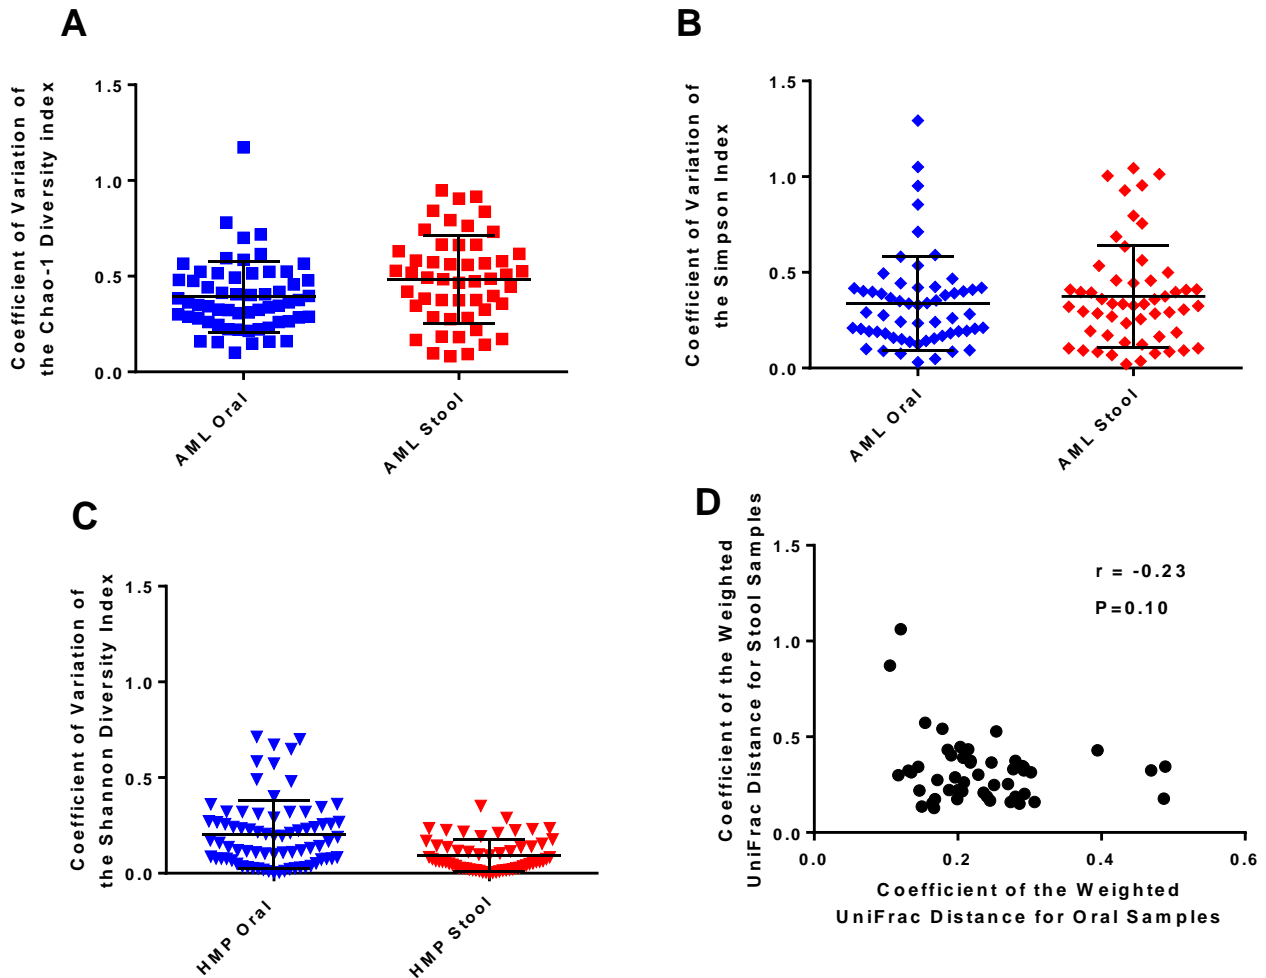

**Fig. S1. The temporal variability of the oral and stool microbial  $\alpha$ -diversity of the AML and HMP cohorts.** (A) Depicted is the oral and stool microbial  $\alpha$ -diversity intra-patient temporal variability. Each point represents the coefficient of variation (CV) of the Chao-1 diversity index for samples derived from each patient with  $\geq 3$  samples. (B) Same as (A) except using the Simpson index. (C) Depicted is the oral and stool microbial  $\alpha$ -diversity intra-patient temporal variability. Each point represents the CV of the Shannon diversity index for samples derived from the HMP cohort. In panels A -C, the bars represent mean  $\pm$  standard deviation values. (D) Portrayed is the correlation between the CV of the Weighted UniFrac Distances originating from oral and stool samples from the same patient. The Pearson's correlation ( $r$ ) value and  $P$  value for correlation analysis also are indicated.

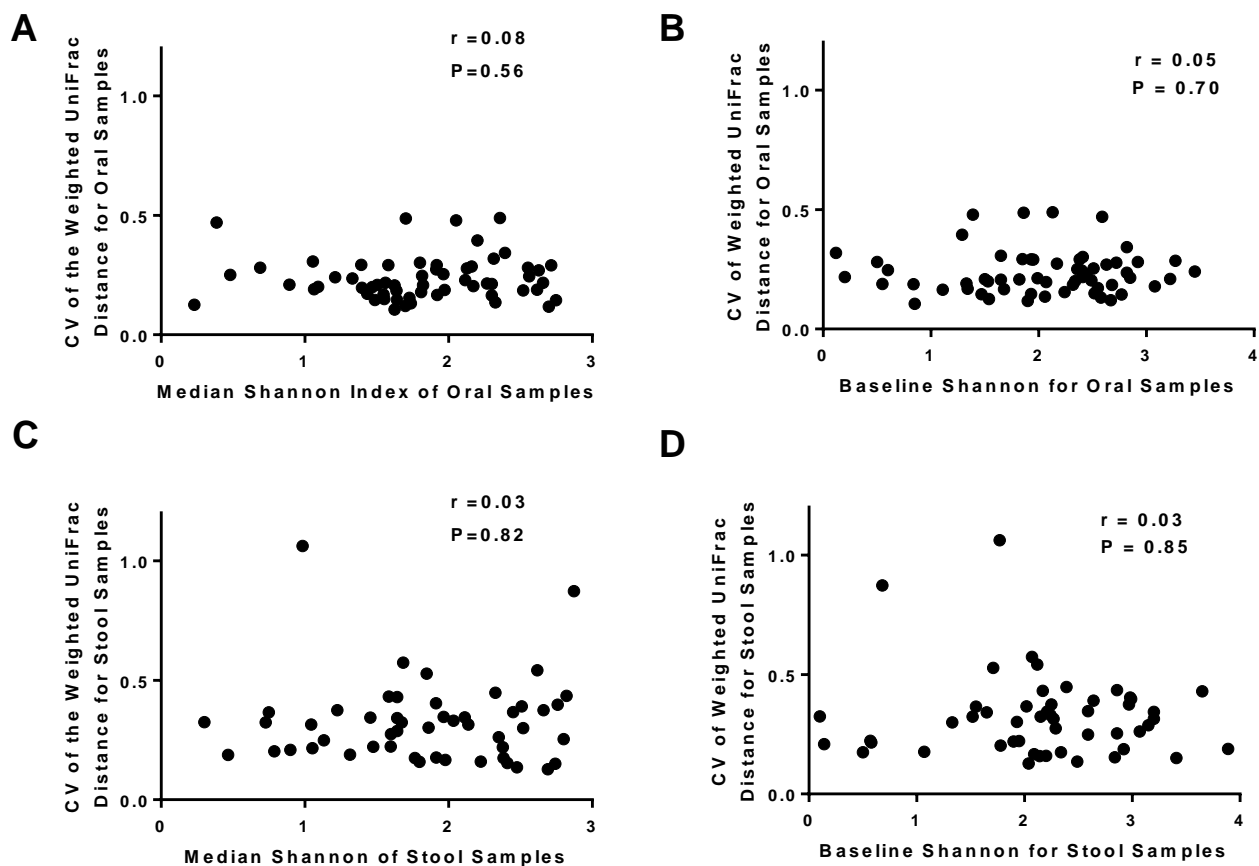

**Fig. S2. No correlation between temporal stability of community structure and bacterial diversity found among treated acute myeloid leukemia patients.** Portrayed is the correlation between the coefficient of variation of the weighted UniFrac distances from oral (A and B) and stool (C and D) samples from each patient and either the median Shannon index of those samples (A and C), or a patient's baseline Shannon diversity (B and D). The Pearson's correlation ( $r$ ) value and  $P$  value for correlation analysis also are indicated.

### Taxa by Patient Microbiome Stability

Patient Microbiome Stability (Coefficient of Variation of Weighted UniFrac Distance): ■ Stable ■ Average ■ Variable

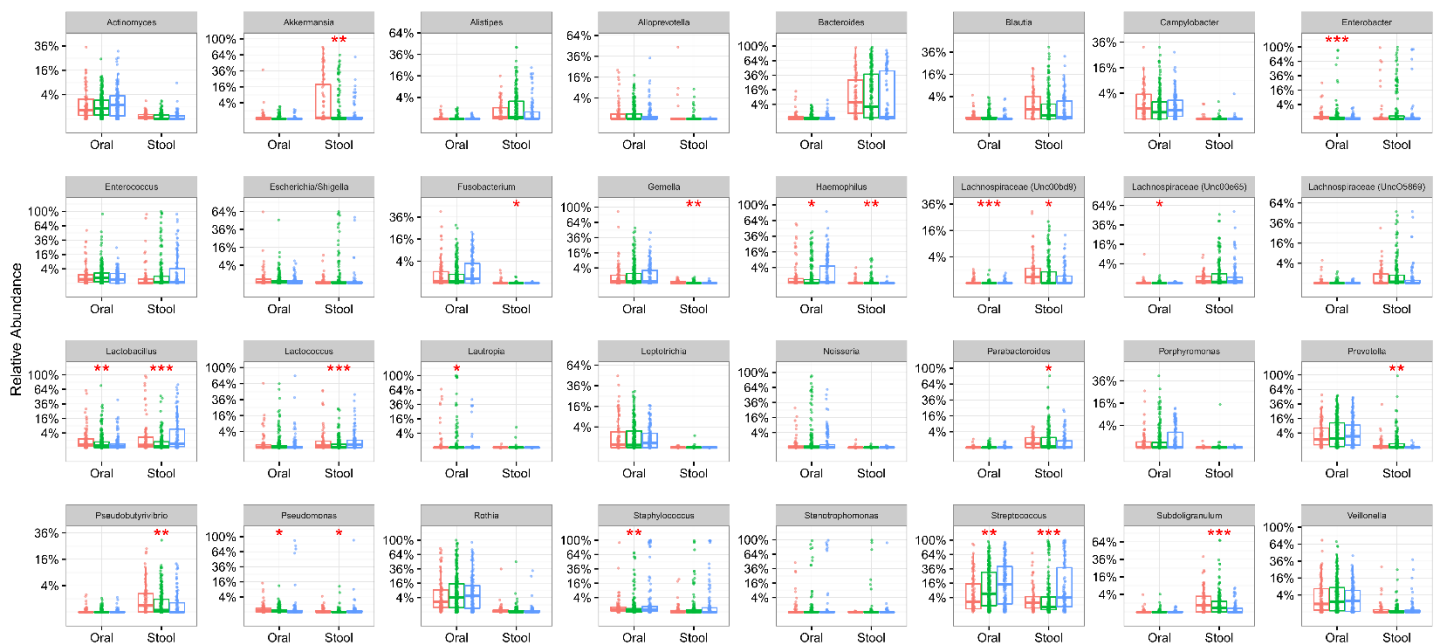

### Taxa by Patient Microbiome Diversity

Patient Microbiome Diversity (Coefficient of Variation of Shannon Diversity Index):

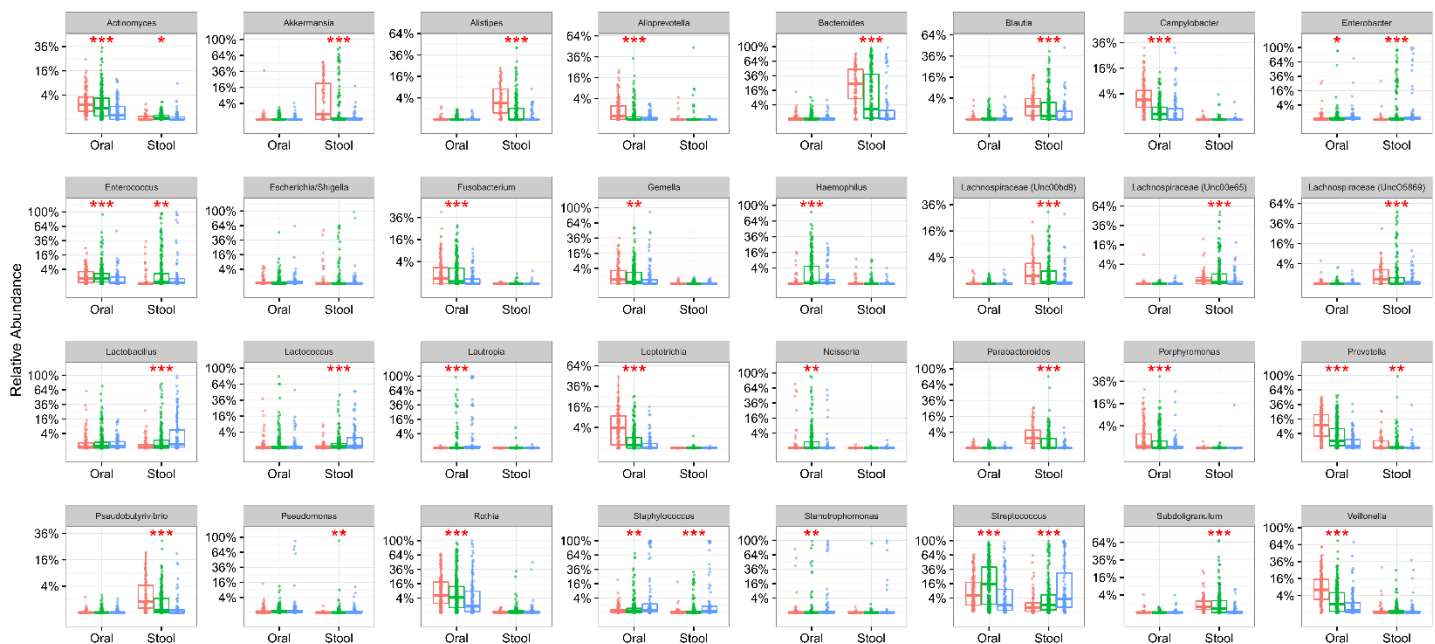

**Fig. S3. Taxonomic composition differences among different stability categories.** Shown are the significant differences in relative abundances of genera between different patient stability categories based on either coefficient of variation (CV) of weighted UniFrac distances (top panels) or the CV of the Shannon diversity index (SDI) (bottom panels). Differences in genera abundance across categories were determined using non-parametric Kruskal-Wallis analysis of variance, then corrected for the false discovery rate using the Benjamini & Hochberg method. Asterisk notations \*, \*\*, and \*\*\* indicate adjusted  $P$  values  $\leq 0.05$ ,  $0.01$ , and  $0.001$ , respectively.

Fig. S4

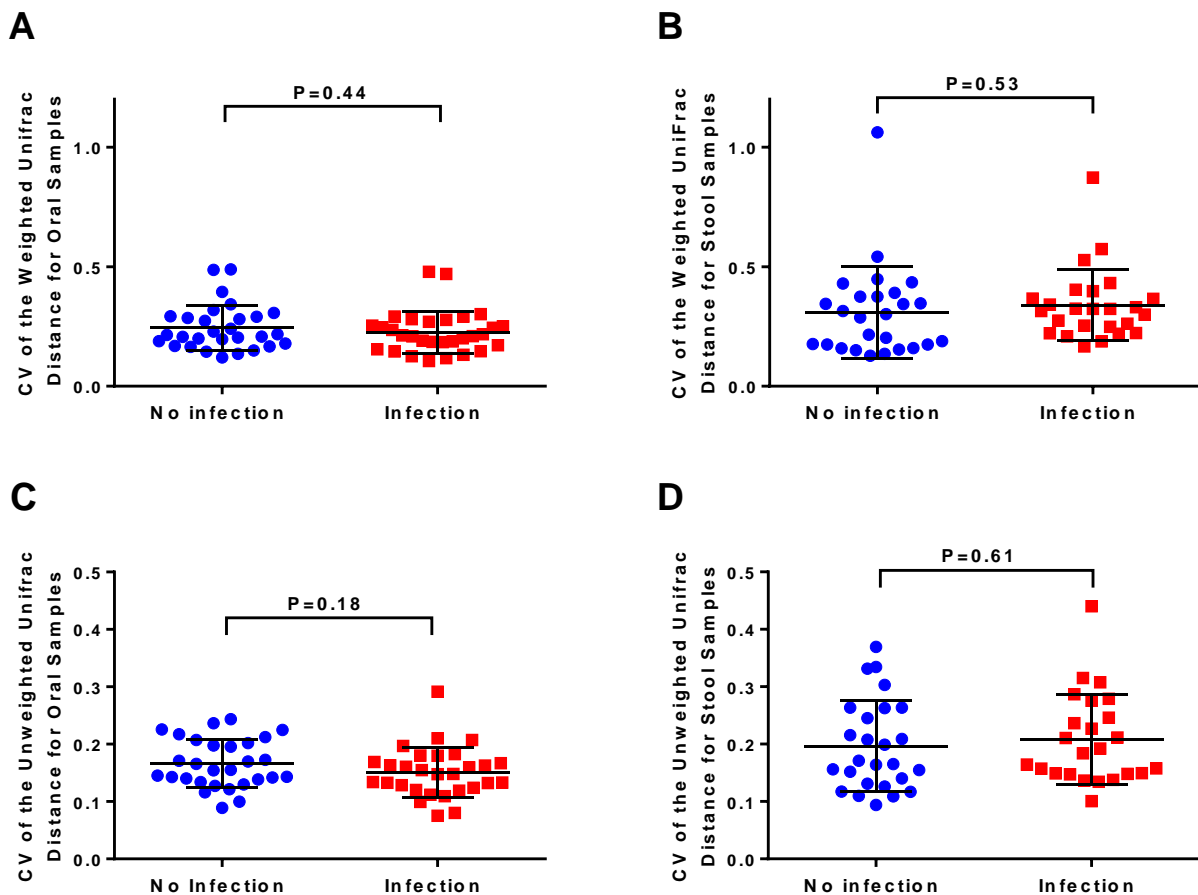

**Fig. S4. Temporal instability of microbiome community structure is not associated with infection during chemotherapy.** Shown are the CVs of the weighted (A and B) and unweighted (C and D) unifracs distances for oral (A and C) and stool (B and D) samples stratified by patients who did or did not contract an infection during the induction phase of chemotherapy before neutrophil recovery. In all panels the bars represent mean  $\pm$  standard deviation values, and  $P$  values comparing CV values among infectious outcomes were calculated using a 2-sample t-test with Welch's correction.

Fig. S5

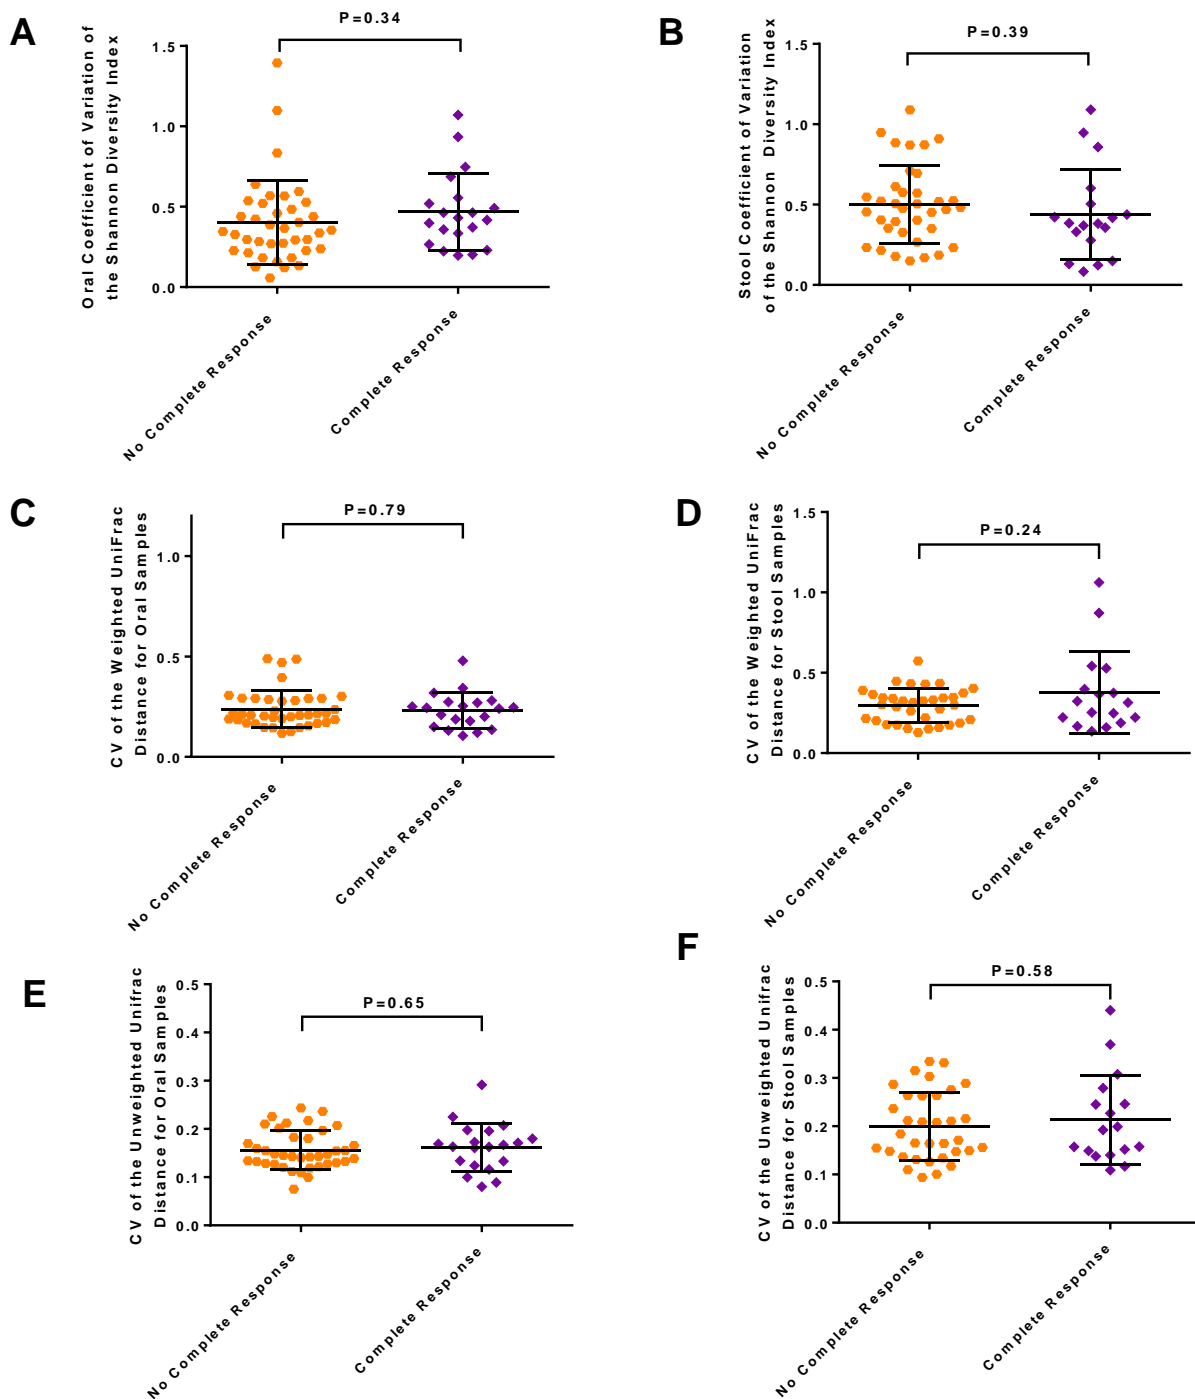

**Fig. S5. Temporal variability of the microbiome is not associated with chemotherapeutic response.** Shown are the CVs of the Shannon diversity index (A and B), weighted (C and D), and unweighted (E and F) unifracs distances for oral (A, C, E) and stool (B, D, F) samples stratified by patients who did or did not have a complete response to induction chemotherapy. In all panels the bars represent mean  $\pm$  standard deviation values, and  $P$  values comparing CV values among infectious outcomes were calculated using a 2-sample t-test with Welch's correction.

**Table S1. Multivariable regression analyses of potential clinical factors associated with the intra-patient temporal instability of the stool as measured by the Coefficient of Variation of the Shannon Diversity Index<sup>1</sup>**

|                                                | Estimate   | Std. Error | t value | P value |
|------------------------------------------------|------------|------------|---------|---------|
| Age                                            | -0.0030511 | 0.0037892  | -0.805  | 0.425   |
| Received Piperacillin/<br>Tazobactam<br>>72hr  | -0.0692387 | 0.1034310  | -0.669  | 0.507   |
| Received Cefepime >72hrs                       | -0.0642391 | 0.0961470  | -0.668  | 0.508   |
| Received Carbapenem >72hrs                     | 0.0910213  | 0.0984667  | 0.924   | 0.360   |
| Days on All Antibiotics <sup>d</sup>           | 0.0028492  | 0.0032929  | 0.865   | 0.392   |
| Days on Treatment<br>Antibiotics               | -0.0004718 | 0.0045104  | -0.105  | 0.917   |
| Number of Antibiotics<br>Received              | 0.0213972  | 0.0229633  | 0.932   | 0.357   |
| Non-Fludarabine High<br>Intensity Chemotherapy | 0.0771821  | 0.0937103  | 0.824   | 0.415   |
| Hypomethylator based<br>Chemotherapy           | 0.1747187  | 0.1478379  | 1.182   | 0.244   |
| ChemoOthers                                    | 0.0870571  | 0.1618069  | 0.538   | 0.593   |

<sup>1</sup> Residual standard error: 0.2507 on 43 degrees of freedom, adjusted R-squared: 0.0397 and p-value: 0.3064.

**Table S2. Multivariable regression analyses of potential clinical factors associated with the intra-patient temporal instability of the stool as measured by the Coefficient of Variation of the Unweighted Unifrac Distance<sup>1</sup>**

|                                                | Estimate   | Std. Error | t value | P value |
|------------------------------------------------|------------|------------|---------|---------|
| Age                                            | -0.0003602 | 0.0021741  | -0.283  | 0.7789  |
| Received Piperacillin/<br>Tazobactam<br>>72hr  | 0.0436241  | 0.0346360  | 1.260   | 0.2151  |
| Received Cefepime >72hrs                       | 0.0139268  | 0.0324944  | 0.430   | 0.6697  |
| Received Carbapenem >72hrs                     | -0.0231621 | 0.0326590  | -0.709  | 0.4823  |
| Days on All Antibiotics <sup>d</sup>           | 0.0001982  | 0.0010993  | 0.180   | 0.8579  |
| Days on Treatment<br>Antibiotics               | -0.0007410 | 0.0015409  | -0.481  | 0.6332  |
| Number of Antibiotics<br>Received              | 0.0027624  | 0.0077760  | 0.355   | 0.7243  |
| Non-Fludarabine High<br>Intensity Chemotherapy | 0.0165690  | 0.0317881  | 0.521   | 0.6051  |
| Hypomethylator based<br>Chemotherapy           | -0.0062450 | 0.0493546  | -0.127  | 0.8999  |
| ChemoOthers                                    | 0.0390815  | 0.0533204  | 0.733   | 0.4679  |

<sup>1</sup> Residual standard error: 0.08237 on 40 degrees of freedom, adjusted R-squared: -0.1106, and p-value: 0.8784.

**Table S3. Multivariable regression analyses of potential clinical factors associated with the intra-patient temporal instability of the stool as measured by the Coefficient of Variation of the Weighted Unifrac Distance<sup>1</sup>**

|                                                | Estimate   | Std. Error | t value | P value |
|------------------------------------------------|------------|------------|---------|---------|
| Age                                            | 0.0004108  | 0.0028111  | 0.149   | 0.885   |
| Received Piperacillin/<br>Tazobactam<br>>72hr  | -0.0025742 | 0.0764188  | -0.034  | 0.973   |
| Received Cefepime >72hrs                       | -0.0338694 | 0.0716937  | -0.472  | 0.639   |
| Received Carbapenem >72hrs                     | -0.0298034 | 0.0720568  | -0.414  | 0.681   |
| Days on All Antibiotics <sup>d</sup>           | 0.0013529  | 0.0024254  | 0.558   | 0.580   |
| Days on Treatment<br>Antibiotics               | -0.0025904 | 0.0033998  | -0.762  | 0.451   |
| Number of Antibiotics<br>Received              | 0.0241723  | 0.0171565  | 1.409   | 0.167   |
| Non-Fludarabine High<br>Intensity Chemotherapy | 0.0527559  | 0.0701354  | 0.752   | 0.456   |
| Hypomethylator based<br>Chemotherapy           | -0.0556192 | 0.1088930  | -0.511  | 0.612   |
| ChemoOthers                                    | 0.0886147  | 0.1176429  | 0.753   | 0.456   |

<sup>1</sup> Residual standard error: 0.1817 on 40 degrees of freedom, adjusted R-squared: -0.1163, and p-value: 0.8937



**Table S4. Multivariable regression analyses of potential clinical factors associated with the intra-patient temporal instability of oral samples as measured by the Coefficient of Variation of the Shannon Diversity Index<sup>1</sup>**

|                                                | Estimate  | Std. Error | t value | P value |
|------------------------------------------------|-----------|------------|---------|---------|
| Age                                            | 0.003785  | 0.003515   | 1.077   | 0.2870  |
| Received Piperacillin/<br>Tazobactam<br>>72hr  | -0.069843 | 0.097154   | -0.719  | 0.4757  |
| Received Cefepime >72hrs                       | -0.142693 | 0.087163   | -1.637  | 0.1082  |
| Received Carbapenem >72hrs                     | 0.029032  | 0.089903   | 0.323   | 0.7482  |
| Days on All Antibiotics <sup>d</sup>           | -0.006798 | 0.003052   | -2.227  | 0.0306  |
| Days on Treatment<br>Antibiotics               | 0.005466  | 0.004250   | 1.286   | 0.2046  |
| Number of Antibiotics<br>Received              | 0.038113  | 0.021953   | 1.736   | 0.0890  |
| Non-Fludarabine High<br>Intensity Chemotherapy | 0.031210  | 0.087383   | 0.357   | 0.7225  |
| Hypomethylator based<br>Chemotherapy           | -0.048031 | 0.140382   | -0.342  | 0.7337  |
| ChemoOthers                                    | 0.048609  | 0.140919   | 0.345   | 0.7316  |

<sup>1</sup> Residual standard error: 0.2429 on 48 degrees of freedom, adjusted R-squared: 0.08042, and p-value: 0.1661.

**Table S5. Multivariable regression analyses of potential clinical factors associated with the intra-patient temporal instability of oral samples as measured by the Coefficient of Variation of the Unweighted Unifrac Distance<sup>1</sup>**

|                                                | Estimate   | Std. Error | t value | P value  |
|------------------------------------------------|------------|------------|---------|----------|
| Age                                            | 9.131e-01  | 5.338e-04  | 0.171   | 0.864908 |
| Received Piperacillin/<br>Tazobactam<br>>72hr  | -1.883e-02 | 1.475e-02  | -1.276  | 0.207937 |
| Received Cefepime >72hrs                       | 7.827e-03  | 1.324e-02  | 0.591   | 0.557092 |
| Received Carbapenem >72hrs                     | -4.519e-03 | 1.365e-02  | -0.305  | 0.761985 |
| Days on All Antibiotics <sup>d</sup>           | 1.912e-03  | 4.635e-04  | 4.125   | 0.000147 |
| Days on Treatment<br>Antibiotics               | -1.239e-03 | 6.445e-04  | -1.920  | 0.060774 |
| Number of Antibiotics<br>Received              | -2.951e-03 | 3.334e-03  | -0.885  | 0.380505 |
| Non-Fludarabine High<br>Intensity Chemotherapy | -7.372e-03 | 1.327e-02  | -0.556  | 0.581112 |
| Hypomethylator based<br>Chemotherapy           | 7.928e-03  | 2.132e-02  | 0.372   | 0.711619 |
| ChemoOthers                                    | -2.641e-02 | 2.140e-02  | -1.234  | 0.223152 |

<sup>1</sup> Residual standard error: 0.03689 on 48 degrees of freedom, adjusted R-squared: 0.2682, and p-value: 0.003797

**Table S6. Multivariable regression analyses of potential clinical factors associated with the intra-patient temporal instability of oral samples as measured by the Coefficient of Variation of the Weighted Unifrac Distance<sup>1</sup>**

|                                                | Estimate   | Std. Error | t value | P value |
|------------------------------------------------|------------|------------|---------|---------|
| Age                                            | -0.0007342 | 0.0011572  | -0.634  | 0.52877 |
| Received Piperacillin/<br>Tazobactam<br>>72hr  | -0.0439871 | 0.0319822  | -1.375  | 0.17540 |
| Received Cefepime >72hrs                       | -0.0020750 | 0.0286934  | -0.072  | 0.94265 |
| Received Carbapenem >72hrs                     | -0.0063201 | 0.0295955  | -0.214  | 0.83180 |
| Days on All Antibiotics <sup>d</sup>           | 0.0032774  | 0.0010047  | 3.262   | 0.00204 |
| Days on Treatment<br>Antibiotics               | -0.0019812 | 0.0013992  | -1.416  | 0.16326 |
| Number of Antibiotics<br>Received              | -0.0011496 | 0.0072269  | -0.159  | 0.87428 |
| Non-Fludarabine High<br>Intensity Chemotherapy | -0.0023525 | 0.0287658  | -0.082  | 0.93516 |
| Hypomethylator based<br>Chemotherapy           | 0.0627605  | 0.0462125  | 1.358   | 0.18079 |
| ChemoOthers                                    | 0.0362807  | 0.0463895  | 0.782   | 0.43800 |

<sup>1</sup> Residual standard error: 0.07998 on 48 degrees of freedom, adjusted R-squared: 0.2218, and p-value: 0.01157

Table S7. Biosample accession numbers

| Accession    | Sample Name |
|--------------|-------------|
| SAMN05961449 | GP0001      |
| SAMN05961450 | GP0002      |
| SAMN05961451 | GP0003      |
| SAMN05961452 | GP0004      |
| SAMN05961453 | GP0005      |
| SAMN05961454 | GP0006      |
| SAMN05961455 | GP0007      |
| SAMN05961456 | GP0008      |
| SAMN05961457 | GP0009      |
| SAMN05961458 | GP0010      |
| SAMN05961459 | GP0011      |
| SAMN05961460 | GP0012      |
| SAMN05961461 | GP0013      |
| SAMN05961462 | GP0014      |
| SAMN05961463 | GP0015      |
| SAMN05961464 | GP0016      |
| SAMN05961465 | GP0017      |
| SAMN05961466 | GP0018      |
| SAMN05961467 | GP0019      |
| SAMN05961468 | GP0020      |
| SAMN05961469 | GP0021      |
| SAMN05961470 | GP0022      |
| SAMN05961471 | GP0023      |
| SAMN05961472 | GP0024      |
| SAMN05961473 | GP0025      |
| SAMN05961474 | GP0027      |
| SAMN05961475 | GP0028      |
| SAMN05961476 | GP0029      |
| SAMN05961477 | GP0030      |
| SAMN05961478 | GP0031      |
| SAMN05961479 | GP0032      |
| SAMN05961480 | GP0033      |
| SAMN05961481 | GP0034      |
| SAMN05961482 | GP0035      |
| SAMN05961483 | GP0036      |
| SAMN05961484 | GP0038      |
| SAMN05961485 | GP0039      |
| SAMN05961486 | GP0040      |
| SAMN05961487 | GP0041      |
| SAMN05961488 | GP0042      |
| SAMN05961489 | GP0043      |
| SAMN05961490 | GP0044      |
| SAMN05961491 | GP0047      |
| SAMN05961492 | GP0048      |
| SAMN05961493 | GP0049      |

SAMN05961494 GP0050  
SAMN05961495 GP0051  
SAMN05961496 GP0052  
SAMN05961497 GP0053  
SAMN05961498 GP0054  
SAMN05961499 GP0055  
SAMN05961500 GP0056  
SAMN05961501 GP0057  
SAMN05961502 GP0058  
SAMN05961503 GP0060  
SAMN05961504 GP0061  
SAMN05961505 GP0062  
SAMN05961506 GP0063  
SAMN05961507 GP0065  
SAMN05961508 GP0066  
SAMN05961509 GP0068  
SAMN05961510 GP0070  
SAMN05961511 GP0071  
SAMN05961512 GP0072  
SAMN05961513 GP0073  
SAMN05961514 GP0074  
SAMN05961515 GP0075  
SAMN05961516 GP0076  
SAMN05961517 GP0077  
SAMN05961518 GP0078  
SAMN05961519 GP0079  
SAMN05961520 GP0080  
SAMN05961521 GP0082  
SAMN05961522 GP0084  
SAMN05961523 GP0085  
SAMN05961524 GP0086  
SAMN05961525 GP0088  
SAMN05961526 GP0089  
SAMN05961527 GP0090  
SAMN05961528 GP0091  
SAMN05961529 GP0092  
SAMN05961530 GP0093  
SAMN05961531 GP0094  
SAMN05961532 GP0095  
SAMN05961533 GP0096  
SAMN05961534 GP0097  
SAMN05961535 GP0098  
SAMN05961536 GP0099  
SAMN05961537 GP0100  
SAMN05961538 GP0101  
SAMN05961539 GP0102  
SAMN05961540 GP0103

SAMN05961541 GP0104  
SAMN05961542 GP0105  
SAMN05961543 GP0106  
SAMN05961544 GP0107  
SAMN05961545 GP0108  
SAMN05961546 GP0110  
SAMN05961547 GP0111  
SAMN05961548 GP0112  
SAMN05961549 GP0113  
SAMN05961550 GP0114  
SAMN05961551 GP0115  
SAMN05961552 GP0116  
SAMN05961553 GP0117  
SAMN05961554 GP0118  
SAMN05961555 GP0119  
SAMN05961556 GP0120  
SAMN05961557 GP0121  
SAMN05961558 GP0123  
SAMN05961559 GP0124  
SAMN05961560 GP0125  
SAMN05961561 GP0126  
SAMN05961562 GP0127  
SAMN05961563 GP0128  
SAMN05961564 GP0129  
SAMN05961565 GP0130  
SAMN05961566 GP0131  
SAMN05961567 GP0132  
SAMN05961568 GP0133  
SAMN05961569 GP0134  
SAMN05961570 GP0135  
SAMN05961571 GP0136  
SAMN05961572 GP0137  
SAMN05961573 GP0138  
SAMN05961574 GP0139  
SAMN05961575 GP0140  
SAMN05961576 GP0141  
SAMN05961577 GP0142  
SAMN05961578 GP0143  
SAMN05961579 GP0144  
SAMN05961580 GP0145  
SAMN05961581 GP0146  
SAMN05961582 GP0147  
SAMN05961583 GP0148  
SAMN05961584 GP0149  
SAMN05961585 GP0150  
SAMN05961586 GP0151  
SAMN05961587 GP0152

SAMN05961588 GP0153  
SAMN05961589 GP0154  
SAMN05961590 GP0155  
SAMN05961591 GP0156  
SAMN05961592 GP0157  
SAMN05961593 GP0158  
SAMN05961594 GP0159  
SAMN05961595 GP0160  
SAMN05961596 GP0161  
SAMN05961597 GP0162  
SAMN05961598 GP0163  
SAMN05961599 GP0164  
SAMN05961600 GP0165  
SAMN05961601 GP0166  
SAMN05961602 GP0167  
SAMN05961603 GP0168  
SAMN05961604 GP0169  
SAMN05961605 GP0170  
SAMN05961606 GP0171  
SAMN05961607 GP0172  
SAMN05961608 GP0174  
SAMN05961609 GP0176  
SAMN05961610 GP0178  
SAMN05961611 GP0180  
SAMN05961612 GP0182  
SAMN05961613 GP0183  
SAMN05961614 GP0185  
SAMN05961615 GP0186  
SAMN05961616 GP0187  
SAMN05961617 GP0189  
SAMN05961618 GP0190  
SAMN05961619 GP0191  
SAMN05961620 GP0193  
SAMN05961621 GP0197  
SAMN05961622 GP0198  
SAMN05961623 GP0199  
SAMN05961624 GP0201  
SAMN05961625 GP0203  
SAMN05961626 GP0205  
SAMN05961627 GP0207  
SAMN05961628 GP0208  
SAMN05961629 GP0209  
SAMN05961630 GP0210  
SAMN05961631 GP0211  
SAMN05961632 GP0212  
SAMN05961633 GP0214  
SAMN05961634 GP0216

SAMN05961635 GP0217  
SAMN05961636 GP0218  
SAMN05961637 GP0219  
SAMN05961638 GP0220  
SAMN05961639 GP0221  
SAMN05961640 GP0222  
SAMN05961641 GP0223  
SAMN05961642 GP0224  
SAMN05961643 GP0225  
SAMN05961644 GP0226  
SAMN05961645 GP0227  
SAMN05961646 GP0228  
SAMN05961647 GP0229  
SAMN05961648 GP0230  
SAMN05961649 GP0231  
SAMN05961650 GP0232  
SAMN05961651 GP0233  
SAMN05961652 GP0234  
SAMN05961653 GP0235  
SAMN05961654 GP0236  
SAMN05961655 GP0237  
SAMN05961656 GP0238  
SAMN05961657 GP0239  
SAMN05961658 GP0240  
SAMN05961659 GP0241  
SAMN05961660 GP0242  
SAMN05961661 GP0243  
SAMN05961662 GP0244  
SAMN05961663 GP0245  
SAMN05961664 GP0246  
SAMN05961665 GP0247  
SAMN05961666 GP0248  
SAMN05961667 GP0249  
SAMN05961668 GP0250  
SAMN05961669 GP0251  
SAMN05961670 GP0253  
SAMN05961671 GP0254  
SAMN05961672 GP0255  
SAMN05961673 GP0257  
SAMN05961674 GP0259  
SAMN05961675 GP0261  
SAMN05961676 GP0262  
SAMN05961677 GP0263  
SAMN05961678 GP0264  
SAMN05961679 GP0265  
SAMN05961680 GP0266  
SAMN05961681 GP0267



SAMN05961682 GP0268  
SAMN05961683 GP0269  
SAMN05961684 GP0270  
SAMN05961685 GP0271  
SAMN05961686 GP0272  
SAMN05961687 GP0273  
SAMN05961688 GP0274  
SAMN05961689 GP0275  
SAMN05961690 GP0276  
SAMN05961691 GP0277  
SAMN05961692 GP0278  
SAMN05961693 GP0279  
SAMN05961694 GP0280  
SAMN05961695 GP0281  
SAMN05961696 GP0282  
SAMN05961697 GP0283  
SAMN05961698 GP0284  
SAMN05961699 GP0285  
SAMN05961700 GP0286  
SAMN05961701 GP0287  
SAMN05961702 GP0288  
SAMN05961703 GP0289  
SAMN05961704 GP0290  
SAMN05961705 GP0291  
SAMN05961706 GP0292  
SAMN05961707 GP0294  
SAMN05961708 GP0295  
SAMN05961709 GP0296  
SAMN05961710 GP0298  
SAMN05961711 GP0299  
SAMN05961712 GP0300  
SAMN05961713 GP0301  
SAMN05961714 GP0302  
SAMN05961715 GP0303  
SAMN05961716 GP0304  
SAMN05961717 GP0305  
SAMN05961718 GP0306  
SAMN05961719 GP0307  
SAMN05961720 GP0308  
SAMN05961721 GP0309  
SAMN05961722 GP0310  
SAMN05961723 GP0311  
SAMN05961724 GP0313  
SAMN05961725 GP0314  
SAMN05961726 GP0315  
SAMN05961727 GP0316  
SAMN05961728 GP0317

SAMN05961729 GP0318  
SAMN05961730 GP0319  
SAMN05961731 GP0320  
SAMN05961732 GP0321  
SAMN05961733 GP0322  
SAMN05961734 GP0323  
SAMN05961735 GP0324  
SAMN05961736 GP0325  
SAMN05961737 GP0327  
SAMN05961738 GP0328  
SAMN05961739 GP0329  
SAMN05961740 GP0330  
SAMN05961741 GP0331  
SAMN05961742 GP0332  
SAMN05961743 GP0333  
SAMN05961744 GP0334  
SAMN05961745 GP0335  
SAMN05961746 GP0336  
SAMN05961747 GP0337  
SAMN05961748 GP0338  
SAMN05961749 GP0339  
SAMN05961750 GP0340  
SAMN05961751 GP0341  
SAMN05961752 GP0342  
SAMN05961753 GP0343  
SAMN05961754 GP0344  
SAMN05961755 GP0345  
SAMN05961756 GP0346  
SAMN05961757 GP0347  
SAMN05961758 GP0348  
SAMN05961759 GP0349  
SAMN05961760 GP0350  
SAMN05961761 GP0351  
SAMN05961762 GP0352  
SAMN05961763 GP0353  
SAMN05961764 GP0354  
SAMN05961765 GP0355  
SAMN05961766 GP0356  
SAMN05961767 GP0357  
SAMN05961768 GP0358  
SAMN05961769 GP0359  
SAMN05961770 GP0360  
SAMN05961771 GP0361  
SAMN05961772 GP0362  
SAMN05961773 GP0363  
SAMN05961774 GP0364  
SAMN05961775 GP0365

SAMN05961776 GP0366  
SAMN05961777 GP0367  
SAMN05961778 GP0368  
SAMN05961779 GP0369  
SAMN05961780 GP0370  
SAMN05961781 GP0371  
SAMN05961782 GP0372  
SAMN05961783 GP0373  
SAMN05961784 GP0374  
SAMN05961785 GP0375  
SAMN05961786 GP0376  
SAMN05961787 GP0377  
SAMN05961788 GP0378  
SAMN05961789 GP0379  
SAMN05961790 GP0380  
SAMN05961791 GP0381  
SAMN05961792 GP0382  
SAMN05961793 GP0383  
SAMN05961794 GP0384  
SAMN05961795 GP0385  
SAMN05961796 GP0386  
SAMN05961797 GP0387  
SAMN05961798 GP0388  
SAMN05961799 GP0389  
SAMN05961800 GP0390  
SAMN05961801 GP0391  
SAMN05961802 GP0392  
SAMN05961803 GP0393  
SAMN05961804 GP0394  
SAMN05961805 GP0395  
SAMN05961806 GP0396  
SAMN05961807 GP0397  
SAMN05961808 GP0398  
SAMN05961809 GP0399  
SAMN05961810 GP0400  
SAMN05961811 GP0401  
SAMN05961812 GP0402  
SAMN05961813 GP0403  
SAMN05961814 GP0404  
SAMN05961815 GP0405  
SAMN05961816 GP0406  
SAMN05961817 GP0407  
SAMN05961818 GP0408  
SAMN05961819 GP0409  
SAMN05961820 GP0410  
SAMN05961821 GP0411  
SAMN05961822 GP0412

SAMN05961823 GP0413  
SAMN05961824 GP0414  
SAMN05961825 GP0415  
SAMN05961826 GP0416  
SAMN05961827 GP0417  
SAMN05961828 GP0418  
SAMN05961829 GP0419  
SAMN05961830 GP0420  
SAMN05961831 GP0421  
SAMN05961832 GP0422  
SAMN05961833 GP0423  
SAMN05961834 GP0424  
SAMN05961835 GP0425  
SAMN05961836 GP0426  
SAMN05961837 GP0427  
SAMN05961838 GP0428  
SAMN05961839 GP0429  
SAMN05961840 GP0430  
SAMN05961841 GP0431  
SAMN05961842 GP0432  
SAMN05961843 GP0433  
SAMN05961844 GP0434  
SAMN05961845 GP0435  
SAMN05961846 GP0436  
SAMN05961847 GP0437  
SAMN05961848 GP0438  
SAMN05961849 GP0439  
SAMN05961850 GP0440  
SAMN05961851 GP0441  
SAMN05961852 GP0442  
SAMN05961853 GP0443  
SAMN05961854 GP0444  
SAMN05961855 GP0445  
SAMN05961856 GP0446  
SAMN05961857 GP0447  
SAMN05961858 GP0448  
SAMN05961859 GP0449  
SAMN05961860 GP0450  
SAMN05961861 GP0451  
SAMN05961862 GP0452  
SAMN05961863 GP0453  
SAMN05961864 GP0454  
SAMN05961865 GP0455  
SAMN05961866 GP0456  
SAMN05961867 GP0457  
SAMN05961868 GP0458  
SAMN05961869 GP0459

SAMN05961870 GP0460  
SAMN05961871 GP0461  
SAMN05961872 GP0462  
SAMN05961873 GP0463  
SAMN05961874 GP0464  
SAMN05961875 GP0465  
SAMN05961876 GP0466  
SAMN05961877 GP0467  
SAMN05961878 GP0468  
SAMN05961879 GP0469  
SAMN05961880 GP0470  
SAMN05961881 GP0471  
SAMN05961882 GP0472  
SAMN05961883 GP0473  
SAMN05961884 GP0474  
SAMN05961885 GP0475  
SAMN05961886 GP0476  
SAMN05961887 GP0477  
SAMN05961888 GP0478  
SAMN05961889 GP0479  
SAMN05961890 GP0480  
SAMN05961891 GP0481  
SAMN05961892 GP0482  
SAMN05961893 GP0483  
SAMN05961894 GP0484  
SAMN05961895 GP0485  
SAMN05961896 GP0486  
SAMN05961897 GP0487  
SAMN05961898 GP0488  
SAMN05961899 GP0489  
SAMN05961900 GP0490  
SAMN05961901 GP0491  
SAMN05961902 GP0492  
SAMN05961903 GP0493  
SAMN05961904 GP0494  
SAMN05961905 GP0495  
SAMN05961906 GP0496  
SAMN05961907 GP0497  
SAMN05961908 GP0498  
SAMN05961909 GP0499  
SAMN05961910 GP0500  
SAMN05961911 GP0501  
SAMN05961912 GP0502  
SAMN05961913 GP0503  
SAMN05961914 GP0504  
SAMN05961915 GP0505  
SAMN05961916 GP0506

SAMN05961917 GP0507  
SAMN05961918 GP0508  
SAMN05961919 GP0509  
SAMN05961920 GP0510  
SAMN05961921 GP0511  
SAMN05961922 GP0512  
SAMN05961923 GP0513  
SAMN05961924 GP0514  
SAMN05961925 GP0515  
SAMN05961926 GP0516  
SAMN05961927 GP0517  
SAMN05961928 GP0518  
SAMN05961929 GP0519  
SAMN05961930 GP0520  
SAMN05961931 GP0521  
SAMN05961932 GP0522  
SAMN05961933 GP0523  
SAMN05961934 GP0524  
SAMN05961935 GP0525  
SAMN05961936 GP0526  
SAMN05961937 GP0527  
SAMN05961938 GP0528  
SAMN05961939 GP0529  
SAMN05961940 GP0530  
SAMN05961941 GP0531  
SAMN05961942 GP0532  
SAMN05961943 GP0533  
SAMN05961944 GP0534  
SAMN05961945 GP0535  
SAMN05961946 GP0536  
SAMN05961947 GP0537  
SAMN05961948 GP0538  
SAMN05961949 GP0539  
SAMN05961950 GP0540  
SAMN05961951 GP0541  
SAMN05961952 GP0542  
SAMN05961953 GP0543  
SAMN05961954 GP0544  
SAMN05961955 GP0545  
SAMN05961956 GP0546  
SAMN05961957 GP0547  
SAMN05961958 GP0548  
SAMN05961959 GP0549  
SAMN05961960 GP0550  
SAMN05961961 GP0551  
SAMN05961962 GP0552  
SAMN05961963 GP0553

SAMN05961964 GP0554  
SAMN05961965 GP0555  
SAMN05961966 GP0556  
SAMN05961967 GP0557  
SAMN05961968 GP0558  
SAMN05961969 GP0559  
SAMN05961970 GP0560  
SAMN05961971 GP0561  
SAMN05961972 GP0562  
SAMN05961973 GP0563  
SAMN05961974 GP0564  
SAMN05961975 GP0565  
SAMN05961976 GP0566  
SAMN05961977 GP0567  
SAMN05961978 GP0568  
SAMN05961979 GP0569  
SAMN05961980 GP0570  
SAMN05961981 GP0571  
SAMN05961982 GP0572  
SAMN05961983 GP0573  
SAMN05961984 GP0574  
SAMN05961985 GP0575  
SAMN05961986 GP0576  
SAMN05961987 GP0577  
SAMN05961988 GP0578  
SAMN05961989 GP0579  
SAMN05961990 GP0580  
SAMN05961991 GP0581  
SAMN05961992 GP0582  
SAMN05961993 GP0583  
SAMN05961994 GP0584  
SAMN05961995 GP0585  
SAMN05961996 GP0586  
SAMN05961997 GP0587  
SAMN05961998 GP0588  
SAMN05961999 GP0589  
SAMN05962000 GP0590  
SAMN05962001 GP0591  
SAMN05962002 GP0592  
SAMN05962003 GP0593  
SAMN05962004 GP0594  
SAMN05962005 GP0595  
SAMN05962006 GP0596  
SAMN05962007 GP0597  
SAMN05962008 GP0598  
SAMN05962009 GP0599  
SAMN05962010 GP0600

SAMN05962011 GP0601  
SAMN05962012 GP0602  
SAMN05962013 GP0603  
SAMN05962014 GP0604  
SAMN05962015 GP0605  
SAMN05962016 GP0606  
SAMN05962017 GP0607  
SAMN05962018 GP0608  
SAMN05962019 GP0609  
SAMN05962020 GP0610  
SAMN05962021 GP0611  
SAMN05962022 GP0612  
SAMN05962023 GP0613  
SAMN05962024 GP0614  
SAMN05962025 GP0615  
SAMN05962026 GP0616  
SAMN05962027 GP0617  
SAMN05962028 GP0618  
SAMN05962029 GP0619  
SAMN05962030 GP0620  
SAMN05962031 GP0621  
SAMN05962032 GP0622  
SAMN05962033 GP0623  
SAMN05962034 GP0624  
SAMN05962035 GP0625  
SAMN05962036 GP0626  
SAMN05962037 GP0627  
SAMN05962038 GP0628  
SAMN05962039 GP0629  
SAMN05962040 GP0630  
SAMN05962041 GP0631  
SAMN05962042 GP0632  
SAMN05962043 GP0633  
SAMN05962044 GP0634  
SAMN05962045 GP0635  
SAMN05962046 GP0636  
SAMN05962047 GP0637  
SAMN05962048 GP0638  
SAMN05962049 GP0639  
SAMN05962050 GP0640  
SAMN05962051 GP0641  
SAMN05962052 GP0642  
SAMN05962053 GP0643  
SAMN05962054 GP0644  
SAMN05962055 GP0645  
SAMN05962056 GP0646  
SAMN05962057 GP0647



SAMN05962058 GP0648  
SAMN05962059 GP0649  
SAMN05962060 GP0650  
SAMN05962061 GP0651  
SAMN05962062 GP0652  
SAMN05962063 GP0654  
SAMN05962064 GP0655  
SAMN05962065 GP0656  
SAMN05962066 GP0657  
SAMN05962067 GP0658  
SAMN05962068 GP0659  
SAMN05962069 GP0660  
SAMN05962070 GP0661  
SAMN05962071 GP0662  
SAMN05962072 GP0663  
SAMN05962073 GP0664  
SAMN05962074 GP0665  
SAMN05962075 GP0666  
SAMN05962076 GP0667  
SAMN05962077 GP0668  
SAMN05962078 GP0669  
SAMN05962079 GP0671  
SAMN05962080 GP0672  
SAMN05962081 GP0673  
SAMN05962082 GP0674  
SAMN05962083 GP0675  
SAMN05962084 GP0676  
SAMN05962085 GP0677  
SAMN05962086 GP0678  
SAMN05962087 GP0679  
SAMN05962088 GP0680  
SAMN05962089 GP0681  
SAMN05962090 GP0682  
SAMN05962091 GP0683  
SAMN05962092 GP0684  
SAMN05962093 GP0685  
SAMN05962094 GP0686  
SAMN05962095 GP0687  
SAMN05962096 GP0688  
SAMN05962097 GP0689  
SAMN05962098 GP0690  
SAMN05962099 GP0691  
SAMN05962100 GP0692  
SAMN05962101 GP0693  
SAMN05962102 GP0694  
SAMN05962103 GP0695  
SAMN05962104 GP0696

SAMN05962105 GP0697  
SAMN05962106 GP0698  
SAMN05962107 GP0699  
SAMN05962108 GP0700  
SAMN05962109 GP0701  
SAMN05962110 GP0702  
SAMN05962111 GP0703  
SAMN05962112 GP0704  
SAMN05962113 GP0705  
SAMN05962114 GP0706  
SAMN05962115 GP0707  
SAMN05962116 GP0708  
SAMN05962117 GP0709  
SAMN05962118 GP0710  
SAMN05962119 GP0711  
SAMN05962120 GP0712  
SAMN05962121 GP0713  
SAMN05962122 GP0714  
SAMN05962123 GP0715  
SAMN05962124 GP0716  
SAMN05962125 GP0717  
SAMN05962126 GP0718  
SAMN05962127 GP0719  
SAMN05962128 GP0720  
SAMN05962129 GP0721  
SAMN05962130 GP0722  
SAMN05962131 GP0723  
SAMN05962132 GP0724  
SAMN05962133 GP0725  
SAMN05962134 GP0726  
SAMN05962135 GP0727  
SAMN05962136 GP0728  
SAMN05962137 GP0729  
SAMN05962138 GP0730  
SAMN05962139 GP0731  
SAMN05962140 GP0732  
SAMN05962141 GP0733  
SAMN05962142 GP0734  
SAMN05962143 GP0735  
SAMN05962144 GP0736  
SAMN05962145 GP0737  
SAMN05962146 GP0738  
SAMN05962147 GP0739  
SAMN05962148 GP0740  
SAMN05962149 GP0741  
SAMN05962150 GP0742  
SAMN05962151 GP0743

SAMN05962152 GP0744  
SAMN05962153 GP0745  
SAMN05962154 GP0746  
SAMN05962155 GP0747  
SAMN05962156 GP0748  
SAMN05962157 GP0749  
SAMN05962158 GP0750  
SAMN05962159 GP0751  
SAMN05962160 GP0752  
SAMN05962161 GP0753  
SAMN05962162 GP0754  
SAMN05962163 GP0755  
SAMN05962164 GP0756  
SAMN05962165 GP0758  
SAMN05962166 GP0759  
SAMN05962167 GP0760  
SAMN05962168 GP0762  
SAMN05962169 GP0765  
SAMN05962170 GP0766  
SAMN05962171 GP0767  
SAMN05962172 GP0768  
SAMN05962173 GP0769  
SAMN05962174 GP0770  
SAMN05962175 GP0771  
SAMN05962176 GP0772  
SAMN05962177 GP0773  
SAMN05962178 GP0775  
SAMN05962179 GP0776  
SAMN05962180 GP0777  
SAMN05962181 GP0778  
SAMN05962182 GP0779  
SAMN05962183 GP0780  
SAMN05962184 GP0781  
SAMN05962185 GP0782  
SAMN05962186 GP0783  
SAMN05962187 GP0784  
SAMN05962188 GP0785  
SAMN05962189 GP0786  
SAMN05962190 GP0787  
SAMN05962191 GP0788  
SAMN05962192 GP0790  
SAMN05962193 GP0792  
SAMN05962194 GP0793  
SAMN05962195 GP0794  
SAMN05962196 GP0795  
SAMN05962197 GP0796  
SAMN05962198 GP0797

SAMN05962199 GP0798  
SAMN05962200 GP0799  
SAMN05962201 GP0800  
SAMN05962202 GP0801  
SAMN05962203 GP0802  
SAMN05962204 GP0803  
SAMN05962205 GP0804  
SAMN05962206 GP0805  
SAMN05962207 GP0806  
SAMN05962208 GP0807  
SAMN05962209 GP0808  
SAMN05962210 GP0809  
SAMN05962211 GP0810  
SAMN05962212 GP0811  
SAMN05962213 GP0812  
SAMN05962214 GP0813  
SAMN05962215 GP0814  
SAMN05962216 GP0815  
SAMN05962217 GP0816  
SAMN05962218 GP0817  
SAMN05962219 GP0818  
SAMN05962220 GP0819  
SAMN05962221 GP0820  
SAMN05962222 GP0821  
SAMN05962223 GP0822  
SAMN05962224 GP0823  
SAMN05962225 GP0824  
SAMN05962226 GP0825  
SAMN05962227 GP0826  
SAMN05962228 GP0827  
SAMN05962229 GP0829  
SAMN05962230 GP0830  
SAMN05962231 GP0831  
SAMN05962232 GP0832  
SAMN05962233 GP0833  
SAMN05962234 GP0834  
SAMN05962235 GP0835  
SAMN05962236 GP0836  
SAMN05962237 GP0837  
SAMN05962238 GP0838  
SAMN05962239 GP0839  
SAMN05962240 GP0840  
SAMN05962241 GP0841  
SAMN05962242 GP0842  
SAMN05962243 GP0843  
SAMN05962244 GP0844  
SAMN05962245 GP0845

SAMN05962246 GP0846  
SAMN05962247 GP0847  
SAMN05962248 GP0848  
SAMN05962249 GP0850  
SAMN05962250 GP0851  
SAMN05962251 GP0852  
SAMN05962252 GP0853  
SAMN05962253 GP0854  
SAMN05962254 GP0855  
SAMN05962255 GP0856  
SAMN05962256 GP0857  
SAMN05962257 GP0858  
SAMN05962258 GP0859  
SAMN05962259 GP0860  
SAMN05962260 GP0861  
SAMN05962261 GP0862  
SAMN05962262 GP0863  
SAMN05962263 GP0864  
SAMN05962264 GP0865  
SAMN05962265 GP0866  
SAMN05962266 GP0867  
SAMN05962267 GP0868  
SAMN05962268 GP0869  
SAMN05962269 GP0870  
SAMN05962270 GP0871  
SAMN05962271 GP0872  
SAMN05962272 GP0873  
SAMN05962273 GP0874  
SAMN05962274 GP0876  
SAMN05962275 GP0877  
SAMN05962276 GP0878  
SAMN05962277 GP0879  
SAMN05962278 GP0880  
SAMN05962279 GP0881  
SAMN05962280 GP0882  
SAMN05962281 GP0883  
SAMN05962282 GP0884  
SAMN05962283 GP0885  
SAMN05962284 GP0886  
SAMN05962285 GP0887  
SAMN05962286 GP0888  
SAMN05962287 GP0889  
SAMN05962288 GP0891  
SAMN05962289 GP0892  
SAMN05962290 GP0893  
SAMN05962291 GP0894  
SAMN05962292 GP0895

SAMN05962293 GP0896  
SAMN05962294 GP0897  
SAMN05962295 GP0898  
SAMN05962296 GP0899  
SAMN05962297 GP0900  
SAMN05962298 GP0901
